# Supplementary material for: Novel Pt-loaded layered double hydroxide nanoparticles for efficient and cancer-cell specific delivery of a cisplatin prodrug
Source: Royal Society of Chemistry journal article supplement (doi:10.1039/c4tb00645c), 2014-05-19
Supplement: c4tb00645c1.pdf [file c4tb00645c1.pdf]

# **Novel Pt-loaded layered double hydroxide nanoparticles for efficient and cancer-cell specific delivery of a cisplatin prodrug**

Rong Ma, Zhigang Wang, Li Yan, Xianfeng Chen,<sup>\*</sup> and Guangyu Zhu<sup>\*</sup>

Department of Biology and Chemistry, Center of Super-Diamond and Advanced Films  
(COSDAF), Department of Physics and Materials Science, City University of Hong Kong,  
Kowloon Tong, Hong Kong SAR; and Shenzhen Research Institute of City University of Hong  
Kong, Shenzhen, 518057, China

## **Electronic Supporting Information**

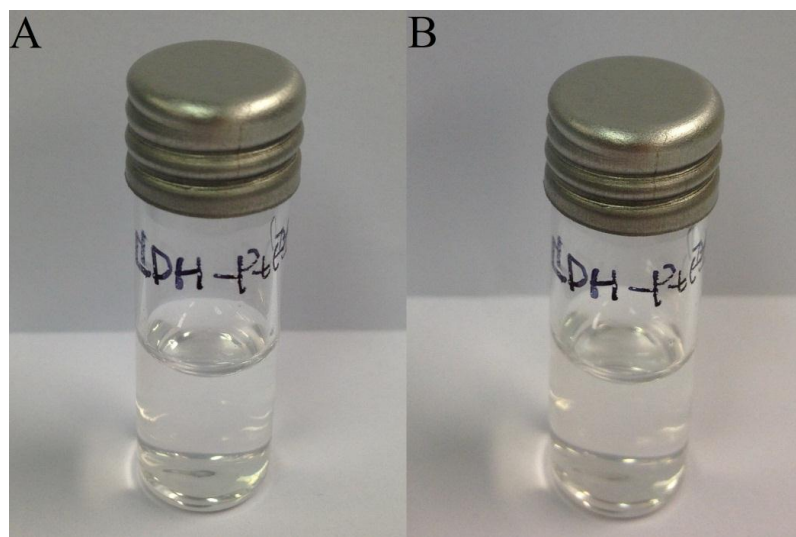

**Figure S1.** Stability of LDH-Pt(IV) in MilliQ water. (A) The as-prepared LDH-Pt(IV) at a concentration of 120  $\mu\text{M}$ ; (B) Sample A stored at 4  $^{\circ}\text{C}$  after 1 month.

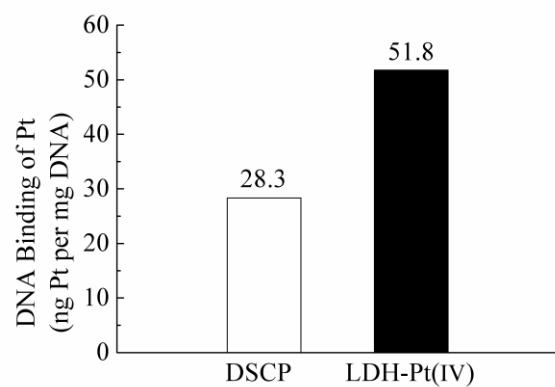

**Figure S2.** Pt contents in genomic DNA of A2780 cells. Cells were treated with 10  $\mu\text{M}$  complexes for 10 h, and Pt contents in genomic DNA were measured.

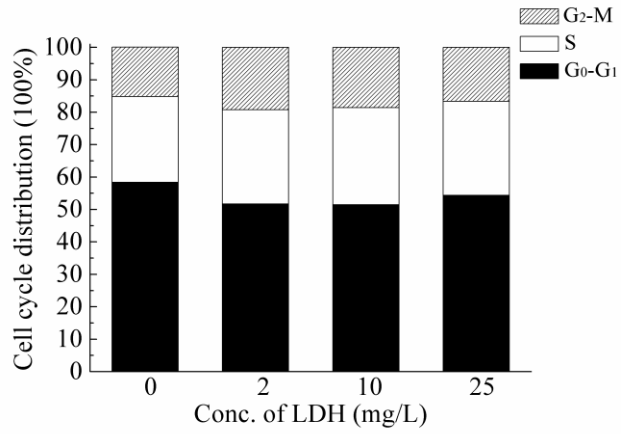

**Figure S3.** Cell cycle arrest of A2780 cells after treatment of LDH for 24 h.

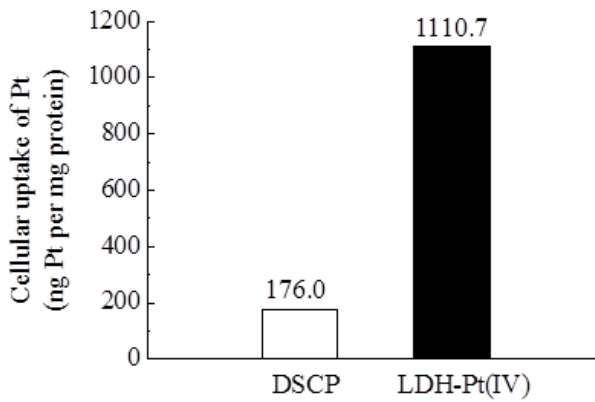

**Figure S4.** Whole cell uptake of DSCP and LDH-Pt(IV) in NIH3T3 cells. Cells were treated with 10  $\mu$ M complexes for 10 h, and Pt contents were measured.
